# Supplementary material for: Monitoring of SARS-CoV-2 Infection in Ragusa Area: Next Generation Sequencing and Serological Analysis
Source: MDPI journal article supplement (doi:10.3390/ijms24054742), 2023-03-01
Supplement: s1 [file s1]

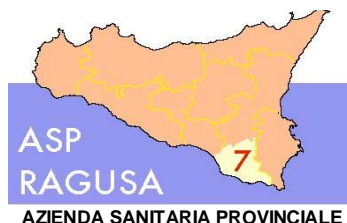

## **MONITORING OF SARS-COV-2 IMMUNE RESPONSE PROJECT**

The anti-SARS-CoV-2 IgG serological test evaluates total anti-SARS-CoV-2 IgG and discriminates the subclasses of IgG induced by SARS-CoV-2 natural infection and/or vaccination (anti-RBD, anti-S1 and anti-S2) or by only natural infection (anti-N).

All HCWs of ASP Ragusa are invited to participate at this project voluntary, writing following anonymous questionnaire.

Date of birth \_\_\_\_\_ Code \_\_\_\_\_

Hospital unit and related operating unit \_\_\_\_\_

- Have you ever affected of COVID-19? ☐ Yes ☐ No
- Report the date of positive test \_\_\_\_\_
- Clinical symptoms related to SARS-CoV-2 infection:  
☐ None ☐ Fever ☐ Cough ☐ Sore throat  
☐ Headache ☐ Muscle aches ☐ Other \_\_\_\_\_
- Have you been hospitalized for COVID-19 ☐ Yes ☐ No
- The last SARS-CoV-2 vaccination dose administered ☐ I dose ☐ II dose ☐ III dose
- Date of vaccination dose administered \_\_\_\_\_

DATE \_\_\_\_\_
